# Supplementary material for: The compound packaged in virions is the key to trigger host glycolysis machinery for virus life cycle in the cytoplasm
Source: PubMed Central journal article supplement — iScience. 2020 Dec 9;24(1):101915. doi: 10.1016/j.isci.2020.101915 (PMC7770649; doi:10.1016/j.isci.2020.101915), 2020-12-09
Supplement: mmc1.pdf [file mmc1.pdf]

iScience, Volume 24

## **Supplemental Information**

**The compound packaged in virions is the key  
to trigger host glycolysis machinery  
for virus life cycle in the cytoplasm**

**Siyuan Zhang, Fan Xin, and Xiaobo Zhang**

## 1 **Transparent Methods**

### 2 **Shrimp culture and WSSV infection**

3 *Marsupenaeus japonicus* shrimp with an average weight of 15 g, collected from a  
4 shrimp aquaculture farm at Hangzhou of Zhejiang province of China, were cultured in  
5 groups of 20 individuals in air-pumped circulating seawater at 25 °C. Three shrimp  
6 were randomly selected for PCR detection of WSSV with WSSV-specific primers  
7 (5'-TTGGTTTCATGCCCGAGATT-3' and 5'-CCTTGGTCAGCCCCTTGA-3') to  
8 ensure that the shrimp used were WSSV free before experiments. The virus-free  
9 shrimp were infected with WSSV ( $10^5$  copies/ml) by injection (100  $\mu$ l WSSV  
10 inoculum/shrimp) into the lateral area of the fourth abdominal segment. At different  
11 times after infection, the WSSV-infected shrimp were collected for later use.

### 12 **Purification of intact WSSV virions**

13 The tissues of WSSV-infected shrimp excluding hepatopancreas were collected in  
14 an ice-bathed beaker and then homogenized in 200 ml TNE buffer [50 mM Tris-HCl,  
15 400 mM NaCl, 5 mM EDTA (ethylene diamine tetraacetic acid), pH 8.5] containing  
16 protease inhibitor phenylmethanesulfonyl fluoride. After centrifugation at  $5,000\times g$  for  
17 10 min at 4 °C, the supernatant was filtered through a nylon net (400 mesh). The  
18 filtrate was centrifuged at  $30,000\times g$  for 30 min at 4 °C. Subsequently the upper loose  
19 pellet was rinsed out carefully, and the lower white pellet was resuspended in 50 ml  
20 TM buffer (50 mM Tris-HCl, 10 mM  $MgCl_2$ , pH 8.0). After centrifugation at  $5,000\times g$   
21 for 10 min at 4 °C, the virus particles were sedimented by centrifugation at  $30,000\times g$

22 for 30 min, followed by resuspension with TM buffer. The purity of the virions was  
23 evaluated using negative-staining transmission electron microscopy (TEM).

#### 24 **Metabolite analysis**

25 The WSSV-infected shrimp hemocytes or the purified WSSV virions ( $10^{10}$  copies)  
26 were mixed with 99% methanol containing 0.05 mM 2-chloro-L-phenylalanine as an  
27 internal standard. The mixture was homogenized for 2 min and centrifuged at  
28  $12000\times g$  at 4 °C for 10 min. Subsequently the supernatant (the extracted metabolites)  
29 was analyzed by liquid chromatography-coupled mass spectrometry (LC-MS) for  
30 metabolic profiling using Agilent 1290 Infinity II UHPLC system and Agilent 6545  
31 UHD and Accurate-Mass Q-TOF/MS (Agilent Technologies, Santa Clara, CA, USA).  
32 The ESI-MS (electrospray ionization-mass spectrometry) was acquired in the positive  
33 ion mode. The product ions of  $m/z$  ranging from 50 to 1500 were collected. The  
34 heated capillary temperature was maintained at 325°C. The drying gas and nebulizer  
35 nitrogen gas flow rates were 10 L/min and 20 psi (pounds per square inch),  
36 respectively. The molecular feature extractor (MFE) algorithm within Mass Hunter  
37 Qualitative analysis software (Agilent Technologies, USA) was used to extract  
38 chemically qualified molecular features. For metabolite identification empirical  
39 formula generation, the molecular formula generator (MFG) algorithm was used to  
40 generate empirical formula and search against METLIN metabolite compound  
41 database (<https://metlin.scripps.edu/>) (Tautenhahn et al., 2012). Data processing was  
42 performed on each individual sample. The metabolite existed in all three samples of

43 each group was retained. According to the results of paired t-test analysis, the  
44 candidate differential metabolites were chosen according to the criteria ( $p < 0.01$  and  
45 fold change  $> 3$ ). To confirm the identified metabolites, pure standards of highest  
46 available purity (Sigma, USA) were prepared in 50% methanol. Then, the standard  
47 metabolite solution was analyzed with LC-MS. Matched retention time and mass  
48 spectral patterns of the standards and samples were compared.

#### 49 **Effects of compounds on WSSV infection in shrimp**

50 WSSV ( $10^5$  copies/ml) and the compound purchased from Sigma (USA) at  
51 different concentrations (1, 10 or 100  $\mu\text{M}$ ) were co-injected into virus-free shrimp at a  
52 volume of 100  $\mu\text{l}$  per shrimp. The compounds were dissolved in dimethyl sulfoxide  
53 (DMSO). WSSV alone ( $10^5$  copies/ml) and physiological saline (0.85% NaCl) were  
54 also injected into shrimp. At different times post-infection (0, 24, 36 and 48 h), three  
55 shrimp were randomly collected for each treatment and subjected to the detection of  
56 WSSV copies. The shrimp mortality was monitored every day. All assays were  
57 biologically repeated three times.

#### 58 **Detection of WSSV copies by quantitative real-time PCR**

59 WSSV copies in shrimp were determined by quantitative real-time PCR as  
60 described before (Cui et al., 2015). DNA extracted from shrimp hemocytes was  
61 subjected to quantitative real-time PCR with WSSV-specific primers  
62 (5'-CCACCAATTCTACTCATGTACCAAA-3';  
63 5'-TCCTTGCAATGGGCAAAATC-3') and probe

64 (5'-FAM-TGCTGCCGTCTCCAA-Eclipse-3'). A linearized plasmid containing a  
65 1400-bp DNA fragment from the WSSV genome was quantified and serially diluted  
66 as an internal standard.

### 67 **Transcriptome sequencing**

68 A total of 1.5 µg RNA per sample was used for RNA sequencing. Sequencing  
69 libraries were generated using NEBNext® Ultra™ RNA Library Prep Kit for  
70 Illumina® (New England Biolabs, USA) following manufacturer's recommendations  
71 and index codes were added to attribute sequences to each sample. Briefly, mRNA  
72 was purified from the total RNA using poly-T oligo-attached magnetic beads.  
73 Fragmentation was carried out using divalent cations under elevated temperature in  
74 NEB next first strand synthesis reaction buffer (5×). The first-stranded cDNA was  
75 synthesized with random hexamer primer and M-MuLV reverse transcriptase (RNase  
76 H). The second-stranded cDNA synthesis was subsequently performed using DNA  
77 polymerase I and RNase H. Remaining overhangs were converted into blunt ends via  
78 exonuclease/polymerase activities. After adenylation of 3' ends of DNA fragments,  
79 NEB next adaptor with hairpin loop structure were ligated to prepare for hybridization.  
80 In order to select cDNA fragments of preferentially 250~300 bp in length, the library  
81 fragments were purified with AMPure XP system (Beckman Coulter, Beverly, USA).  
82 Then 3 µl USER enzymes (New England Biolabs) were used with size-selected  
83 adaptor-ligated cDNA at 37 °C for 15 min, followed by 5 min at 95 °C before PCR.  
84 PCR was performed with phusion high-fidelity DNA polymerase, universal PCR

85 primers and index primer. PCR products were purified (AMPure XP system) and  
86 library quality was assessed on the Agilent Bioanalyzer 2100 system.

### 87 **Kyoto encyclopedia of genes and genomes (KEGG) analysis**

88 The coding sequences of transcripts were extracted and used as queries to search  
89 the protein sequences collected in the GO (gene ontology) database with the blast  
90 E-value of less than  $1 \times 10^{-5}$ . The best hit GO identities were assigned to the transcripts.  
91 The p-values were corrected for false discovery rate. Deduced genes with homologues  
92 in other organisms were used to map to conserved biological pathways.

### 93 **Identification of proteins bound to palmitic amide**

94 To obtain the proteins interacted with palmitic amide, palmitic amide was labeled  
95 with biotin according to the manufacturer's instructions (Thermo Scientific, USA).  
96 Then the biotin-labeled palmitic amide was coupled to Dynabeads MyOne  
97 Streptavidin T1 (GE Healthcare, USA). Shrimp hemocytes were lysed with cell lysis  
98 buffer (20 mM Tris-HCl, 150 mM NaCl, 1% Triton X-100, pH 7.5) on ice for 2 h.  
99 After centrifugation at  $15,000 \times g$  for 20 min, the supernatant was incubated with 1 mL  
100 of palmitic amide-coupled beads or negative control (Dynabeads alone) overnight at  
101 4 °C with gentle rotation. The beads were washed five times with PBS to remove  
102 non-specific proteins. The mixture containing bound proteins was analyzed with  
103 SDS-PAGE. Proteins were visualized using Coomassie blue staining. The visible  
104 interested protein bands were excised from SDS-PAGE gel and subjected to protein  
105 identification by mass spectrometry (Bruker Daltonics, USA).

106 **RNAi (RNA interference) assay**

107 Small interfering RNA (siRNA) was designed and synthesized in vitro using a T7  
108 kit according to the manufacturer's manual (TaKaRa, Japan). The siRNAs (TPI-  
109 siRNA, 5'-UGCUGACGAUCUUCUUGC-3'; TPI-siRNA-scrambled, 5'-CCAGCCU  
110 ACAAGAUUCCCAA-3'; HIF-1-siRNA, 5'-UACUAUCCUUCCCUGUACG-3';  
111 HIF-1-siRNA-scrambled, 5'-AUGUACUGAGCUAAUUGCG-3') were dissolved in  
112 siRNA buffer (50 mM Tris-HCl, 100 mM NaCl, pH 7.5) and quantified by  
113 spectrophotometry. RNAi assay was conducted in shrimp by the injection of a siRNA  
114 (30 µg/shrimp) into the lateral area of the fourth abdominal segment using a syringe  
115 with a 29-gauge needle. At different times after injection, the shrimp hemocytes were  
116 collected for later use. The assays were biologically repeated for three times.

117 **Northern blotting**

118 Total RNAs were extracted using a mirVana miRNA isolation kit according to the  
119 manufacturer's instructions (Ambion, USA). Subsequently the total RNAs were  
120 electrophoresed in a denaturing 15% polyacrylamide gel containing 8 M urea and  
121 transferred to a Hybond-N membrane (Amersham Biosciences, Buckinghamshire,  
122 UK). After cross-linking with ultraviolet, the membrane was prehybridized in DIG  
123 (digoxigenin) Easy Hyb granule buffer (Roche, Switzerland) for 0.5 h, followed by  
124 hybridization with DIG-labeled TPI probe (5'-GGTCAGGCTCCCCGAAGAC-3') or  
125 HIF-1 probe (5'-CGAGGAGCGAAGATCTTGGATGTG-3') for 20 h at 45 °C.  
126 Shrimp β-actin probe (5'-CTCGCTCGGCGGTGGTCGTGA-3') was included as a

127 control. Signal detection was performed following the instructions for a DIG High  
128 Prime DNA labeling and detection starter kit II (Roche, Switzerland).

### 129 **Isothermal titration calorimetry (ITC)**

130 The titration experiments were conducted on a VP-ITC platform (MicroCal™,  
131 Inc., Northampton, MA, USA) at 25 °C to characterize the protein-compound  
132 interaction. The protein (at a final concentration of 100 μM) in the cell of the VP-ITC  
133 platform was added with a compound (1 mM) at 10 μL/120 s. All experiments were  
134 conducted at least in triplicate. The data were analyzed using Origin 7 and fitted to a  
135 “One-Sites” model (MicroCal™ Inc.). The thermodynamic association constant ( $K_a$ )  
136 and enthalpy change ( $\Delta H$ ) were calculated directly. The dissociation constant ( $K_d$ )  
137 was calculated according to the equation  $K_d = 1/K_a$ . The Gibbs free energy change  
138 ( $\Delta G$ ) was calculated using the equation  $\Delta G = -RT \ln K_a$ , where R was the molar gas  
139 constant and T was the absolute temperature at which the experiment was conducted.  
140 The entropy change ( $\Delta S$ ) of the interaction was calculated according to the equation  
141  $T\Delta S = \Delta H - \Delta G$ .

### 142 **Examination of glycolysis**

143 To examine the shrimp glycolysis, shrimp hemocytes were collected, followed by  
144 the quantification of glucose and lactate contents. The hemocytes were centrifuged at  
145 300×g for 10 min at 4 °C. Subsequently the concentration of glucose or lactate of the  
146 supernatant was determined using glucose assay kit (Beijing Solarbio Science &  
147 Technology Co., Ltd., China) or lactate assay kit (Solarbio, China). Briefly 20 μL of



148 sample was mixed with 200  $\mu$ L of glucose or lactate working reagent in a single well  
149 of a 96-well plate. After incubation at 37 °C for 15 min for glucose or at 25 °C for 5  
150 min for lactate, the absorbance of the sample was measured at 505 nm (glucose) or  
151 570 nm (lactate). To quantify the content of glucose or lactate, a standard curve was  
152 generated. Subsequently the absolute content of glucose or lactate was determined.

### 153 **Western blot**

154 Proteins were separated using 12% SDS-PAGE and then transferred to a  
155 polyvinylidene fluoride (PVDF) membrane (Amersham Biosciences, UK). The  
156 membrane was blocked with TBST (Tris-buffered saline with Tween 20) containing  
157 5% skimmed milk. Subsequently the membrane was incubated overnight with a  
158 primary antibody, followed by incubation with horseradish peroxidase  
159 (HRP)-conjugated secondary antibody (Sigma-Aldrich, USA) for 2 h at room  
160 temperature. The primary antibody was prepared in our laboratory. The proteins were  
161 detected using Western Lightning Plus-ECL Oxidizing Reagent Plus (PerkinElmer,  
162 USA).

### 163 **Detection of TPI enzymatic activity**

164 Cytoplasmic proteins were prepared using the NE-PER protein extraction kit  
165 (Pierce, Rockford, IL, USA). The protein concentration was measured with the  
166 Bradford protein assay (Bio-Rad Laboratories, Hercules, CA, USA). The enzymatic  
167 activity of TPI was determined as described previously (Olivaresillana et al., 2017),  
168 based on the conversion of glyceraldehyde 3-phosphate into dihydroxyacetone

169 phosphate 2. The cytoplasmic proteins (5 ng/mL) were mixed with the reaction buffer  
170 [100 mM triethanolamine, 10 mM ethylene diamine tetraacetic acid (EDTA), 0.2 mM  
171 nicotinamide adenine dinucleotide (NADH), 1 mM glyceraldehyde 3-phosphate (GAP)  
172 and 20  $\mu$ g of  $\alpha$ -glycerol phosphate dehydrogenase ( $\alpha$ -GPDH)] at a final volume of 1  
173 mL. After incubation at 25 °C for 5 min, the absorbance of the sample was measured  
174 at 340 nm with a plate reader. To quantify TPI enzymatic activity, a standard curve  
175 was generated. The TPI activity unit was determined as the micromoles of NADH  
176 formed per min per mg of protein at 25 °C.

#### 177 **Examination of tricarboxylic acid cycle (TCA)**

178 To examine Sanchez the host's TCA, the contents of acetyl CoA and  
179 mitochondrial citric acid of hemocytes were measured using the acetyl CoA assay kit  
180 (Beijing Solarbio Science & Technology Co., Ltd., China) and the mitochondrial citric  
181 acid assay kit (Solarbio, China), respectively. Briefly 20  $\mu$ L of sample was mixed  
182 with 200  $\mu$ L of working reagent (Solarbio, China) in a single well of a 96-well plate.  
183 After incubation at 37 °C for 30 min, the absorbance of the sample was measured at  
184 330 nm with a plate reader.

#### 185 **Statistical analysis**

186 The numerical data from three independent experiments were analyzed by  
187 one-way analysis of variance (ANOVA). The differences between treatments were  
188 analyzed by Student's t-test.

189

190 **Supplemental References**

191 Cui, Y., Huang, T., & Zhang, X. (2015). RNA editing of microRNA prevents  
192 RNA-induced silencing complex recognition of target mRNA. *Open Biol.* 5 (12),  
193 150126.

194 Olivaresillana, V., Riverosrosas, H., Cabrera, N., De Gomezpuyou, M. T.,  
195 Perezmontfort, R., Costas, M., & Gomezpuyou, A. (2017). A guide to the effects of a  
196 large portion of the residues of triosephosphate isomerase on catalysis, stability,  
197 druggability, and human disease. *Proteins* 85 (7), 1190-1211.

198 Tautenhahn, R., Cho, K., Uritboonthai, W., Zhu, Z., Patti, G. J., & Siuzdak, G. (2012).  
199 An accelerated workflow for untargeted metabolomics using the METLIN database.  
200 *Nat. Biotechnol.* 30 (9), 826-828.
